# Supplementary material
Source: PubMed Central journal article supplement (PMC3223822)

## **Supplementary Figure 1**

Densitometric assay of the experiment shown in the left panel of Figure 1b. The ratio of the densitometric assay for phospho/total protein is shown, except for P-4EBP 65 that was normalized to tubulin. Data are mean  $\pm$  SEM.

## **Supplementary Figure 2**

Tunel assays were performed on primary hepatocyte cell cultures 36 hours after growth factor stimulation. A minimum of 300 hepatocytes in 5 separate, randomly selected fields was analyzed ( $n = 4$  per genotype). Data are mean  $\pm$  SEM of four independent cultures.

### **Supplementary Figure 3**

PCNA-positive hepatocytes of the indicated genotypes two days after injection of adenoviruses expressing GFP or cyclin D1. Data are expressed as percentage of PCNA positive cell  $\pm$  SEM for 4 mice per genotype. a:  $p < 0.05$  versus GFP treated mice.

# Supplementary Figure 1

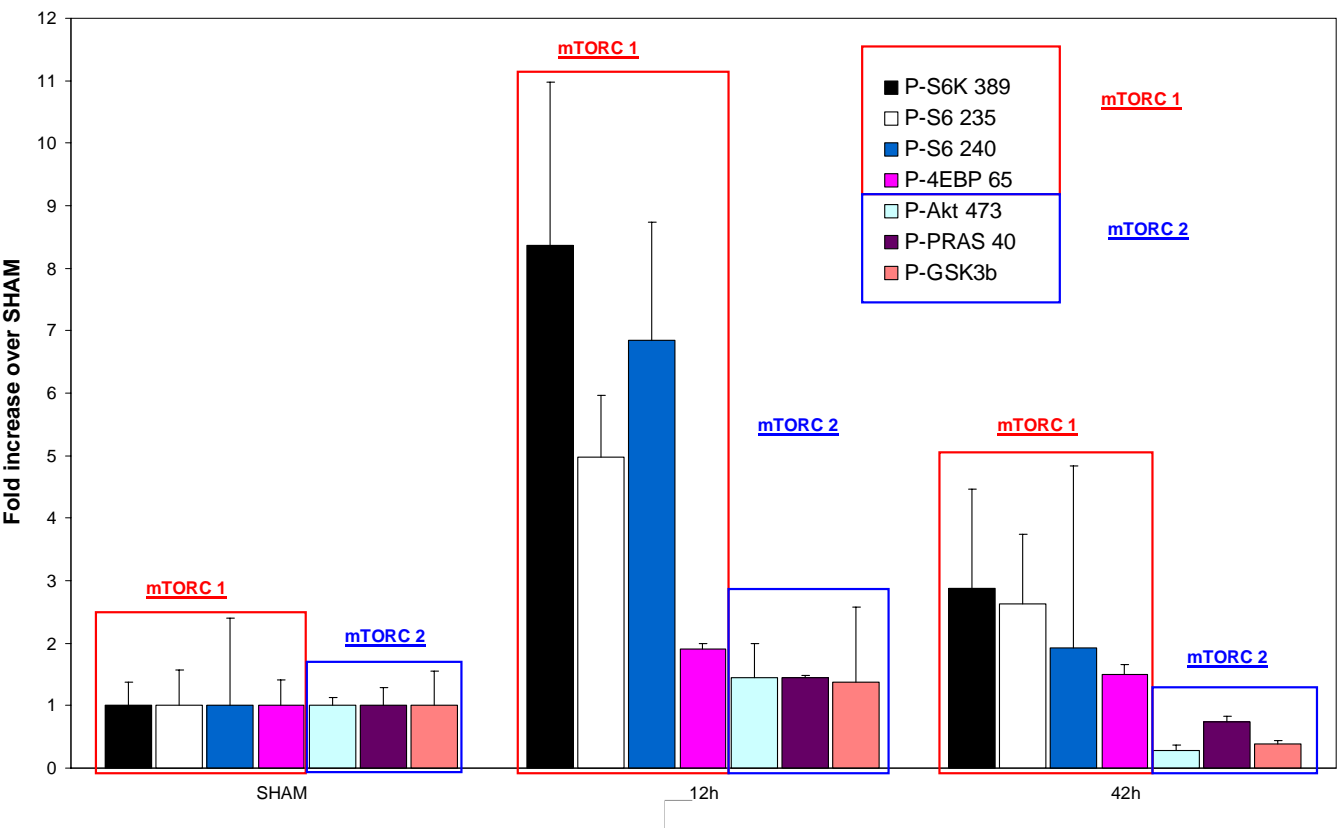

## Supplementary Figure 2

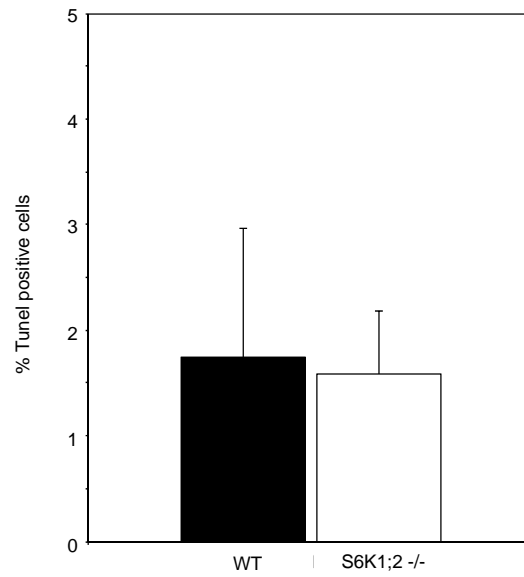

## Supplementary Figure 3

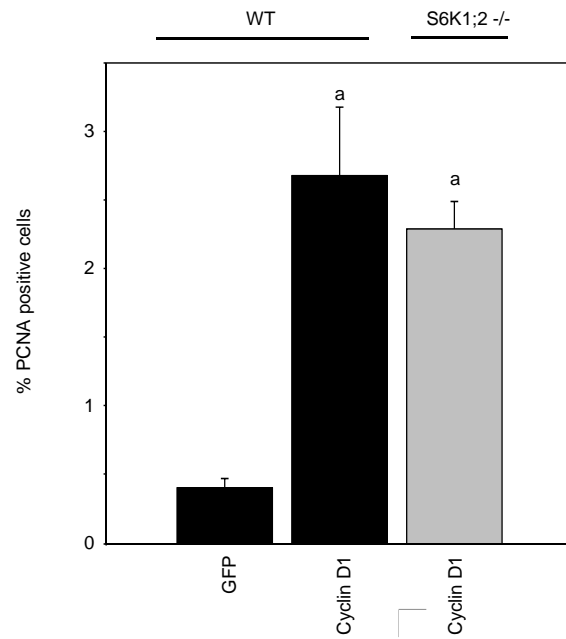

Supplement: JCI44203sd.pdf [file JCI44203sd.pdf]
